# Supplementary material for: Cleaning products and respiratory health outcomes in occupational cleaners: a systematic review and meta-analysis
Source: HighWire-hosted journal article supplement (doi:10.1136/oemed-2020-106776), 2020-11-24
Supplement: oemed-2020-106776supp001_data_supplement.pdf [file oemed-2020-106776supp001_data_supplement.pdf]

## SUPPLEMENTARY FILE

**Table S1:** Search strategy containing the keywords, MeSH terms and Boolean operators used to retrieve references on the MEDLINE (PUBMED) and EMBASE databases

| <b>DATABASE MEDLINE via PUBMED</b> |                                                                                                                                                                                                                                                                                                                                                                                                                                                                                                                                                                                                                                                                                                                      |
|------------------------------------|----------------------------------------------------------------------------------------------------------------------------------------------------------------------------------------------------------------------------------------------------------------------------------------------------------------------------------------------------------------------------------------------------------------------------------------------------------------------------------------------------------------------------------------------------------------------------------------------------------------------------------------------------------------------------------------------------------------------|
| <b>DATE</b>                        | <b>24<sup>th</sup> March 2017 and updated to the 31<sup>st</sup> July 2020</b>                                                                                                                                                                                                                                                                                                                                                                                                                                                                                                                                                                                                                                       |
| <b>STRATEGY</b>                    | <b>#1 AND #2 AND #3 AND #4</b>                                                                                                                                                                                                                                                                                                                                                                                                                                                                                                                                                                                                                                                                                       |
| #1                                 | Occupation*                                                                                                                                                                                                                                                                                                                                                                                                                                                                                                                                                                                                                                                                                                          |
| #2                                 | Clean*                                                                                                                                                                                                                                                                                                                                                                                                                                                                                                                                                                                                                                                                                                               |
| #3                                 | Detergents [mesh] OR Irritants [mesh] OR Disinfectants [mesh] OR Spray* OR Allergens [mesh] OR Inhalation exposure [mesh] OR Occupational exposure [mesh]                                                                                                                                                                                                                                                                                                                                                                                                                                                                                                                                                            |
| #4                                 | Respiratory tract diseases [mesh] OR Bronchial hyperreactivity [mesh] OR Airway hyper* OR Respiratory hypersensitivity [mesh] OR Airway irritation OR Airway obstruction OR Respiratory symptoms OR Airway symptoms OR Cough [mesh] OR Wheez* OR Dyspnea [mesh] OR Chest tightness OR Lung function OR Forced expiratory volume [mesh] OR Vital capacity [mesh] OR Peak expiratory flow rate [mesh] OR Respiratory function tests [mesh] OR Bronchial provocation tests [mesh] OR FeNO OR Asthma OR Occupational asthma [mesh] OR Occupational disease [mesh] OR Work-related asthma OR Work-exacerbated asthma OR Rhinitis [mesh] OR Pulmonary disease, chronic obstructive [mesh] OR Vocal cord dysfunction [mesh] |
|                                    |                                                                                                                                                                                                                                                                                                                                                                                                                                                                                                                                                                                                                                                                                                                      |
| <b>DATABASE EMBASE</b>             |                                                                                                                                                                                                                                                                                                                                                                                                                                                                                                                                                                                                                                                                                                                      |
| <b>DATE</b>                        | <b>24<sup>th</sup> March 2017 and updated to the 31<sup>st</sup> July 2020</b>                                                                                                                                                                                                                                                                                                                                                                                                                                                                                                                                                                                                                                       |
| <b>STRATEGY</b>                    | <b>#1 AND #2 AND #3 AND #4</b>                                                                                                                                                                                                                                                                                                                                                                                                                                                                                                                                                                                                                                                                                       |
| #1                                 | Occupation*                                                                                                                                                                                                                                                                                                                                                                                                                                                                                                                                                                                                                                                                                                          |
| #2                                 | Clean* or Cleaning [mesh]                                                                                                                                                                                                                                                                                                                                                                                                                                                                                                                                                                                                                                                                                            |
| #3                                 | Detergent [mesh] OR Irritant agent [mesh] OR Disinfectant agent [mesh] OR Spray* OR Allergen [mesh] OR Inhalation exposure [mesh] OR Occupational exposure [mesh]                                                                                                                                                                                                                                                                                                                                                                                                                                                                                                                                                    |

|    |                                                                                                                                                                                                                                                                                                                                                                                                                                                                                                                                                                                                                                                                                                                                                  |
|----|--------------------------------------------------------------------------------------------------------------------------------------------------------------------------------------------------------------------------------------------------------------------------------------------------------------------------------------------------------------------------------------------------------------------------------------------------------------------------------------------------------------------------------------------------------------------------------------------------------------------------------------------------------------------------------------------------------------------------------------------------|
| #4 | Respiratory tract disease [mesh] OR Lower respiratory tract [mesh] OR Bronchus hyperreactivity [mesh] OR Airway hyper* OR Airway irritation OR Airway obstruction [mesh] OR Respiratory symptoms OR Airway symptoms OR Coughing [mesh] OR Wheezing [mesh] OR Dyspnea [mesh] OR Chest tightness [mesh] OR Lung function [mesh] OR Forced expiratory volume [mesh] OR Vital capacity [mesh] OR Peak expiratory flow [mesh] OR Respiratory function [mesh] OR Provocation test [mesh] OR Inhalation test [mesh] OR FeNO OR Asthma [mesh] OR Occupational asthma [mesh] OR Occupational disease [mesh] OR Work-related asthma OR Work-exacerbated asthma OR Rhinitis [mesh] OR Chronic obstructive lung disease [mesh] OR Vocal cord disorder [mesh] |
|----|--------------------------------------------------------------------------------------------------------------------------------------------------------------------------------------------------------------------------------------------------------------------------------------------------------------------------------------------------------------------------------------------------------------------------------------------------------------------------------------------------------------------------------------------------------------------------------------------------------------------------------------------------------------------------------------------------------------------------------------------------|

**Table S2.** Inclusion and exclusion criteria used when screening retrieved articles.

| <b>Inclusion Criteria</b> |                                                                                      |
|---------------------------|--------------------------------------------------------------------------------------|
| <b>1</b>                  | Adults (>18 years old)                                                               |
| <b>2</b>                  | Professional cleaners (receive a wage to clean) – domestic and non-domestic          |
| <b>3</b>                  | Healthcare workers including nurses with cleaning job tasks                          |
| <b>4</b>                  | Observational studies                                                                |
| <b>Exclusion Criteria</b> |                                                                                      |
| <b>1</b>                  | Cleaners who work in industrial/factory settings or use industrial cleaning products |
| <b>2</b>                  | Cleaners who work outdoors                                                           |
| <b>3</b>                  | Non-professional domestic cleaners                                                   |
| <b>4</b>                  | Not in English                                                                       |
| <b>5</b>                  | Literature reviews, Editorials, Letters                                              |
| <b>6</b>                  | Case reports/series                                                                  |
| <b>7</b>                  | Studies evaluating work-exacerbated asthma only                                      |
| <b>8</b>                  | Studies on occupational health surveillance or compensations claim systems           |
| <b>9</b>                  | Studies on census-linked data                                                        |

| Table S3:<br>Summary of epidemiological studies assessing the associations between professional cleaning work (domestic vs. non-domestic) and asthma and rhinitis. Also low/very low quality studies are included. <b>Author</b> | Year | Country | Year of data collection | Study design | Sample size (n) | Method of data collection | Co-variates | Type of cleaner | Findings |          | GRADE score |
|----------------------------------------------------------------------------------------------------------------------------------------------------------------------------------------------------------------------------------|------|---------|-------------------------|--------------|-----------------|---------------------------|-------------|-----------------|----------|----------|-------------|
|                                                                                                                                                                                                                                  |      |         |                         |              |                 |                           |             |                 | Asthma   | Rhinitis |             |
|                                                                                                                                                                                                                                  |      |         |                         |              |                 |                           |             |                 |          |          |             |

|                    |      |                                  |           |                                  |                                                                      |                                                                                                                      |                                    |                 |                                                                                                                                  |  |          |
|--------------------|------|----------------------------------|-----------|----------------------------------|----------------------------------------------------------------------|----------------------------------------------------------------------------------------------------------------------|------------------------------------|-----------------|----------------------------------------------------------------------------------------------------------------------------------|--|----------|
| Zock et al.        | 2002 | 11 European and 3 outside Europe |           | Population-based cross-sectional | 4796                                                                 | Questionnaire, Blood samples for serum IgE                                                                           | Age, Gender, Smoking, Study centre |                 | WRA OR 2.47 (95% CI 1.7 – 3.6)<br><br>Possible mechanism: Cleaning significantly reduces association with atopy OR 0.51 (p<0.05) |  | Moderate |
| Karjalainen et al. | 2002 | Finland                          | 1986-1998 | Registry-based cohort            | 53708 cleaners/202751 administrative managerial and clerical workers | The Medication Reimbursement Register of the SII of Finland and the Finnish Register of Occupational Diseases (FROD) | Age, Follow-up period              | Female cleaners | WRA RR 1.50 (95% CI 1.48 – 1.57)                                                                                                 |  | High     |
| Jaakkola et al.    | 2003 | Finland                          |           | Population-based case-control    | 521 asthma/932 non-manual workers                                    | Questionnaire                                                                                                        | Age, Gender, Smoking,              | Female cleaners | OA OR 1.42 (95% CI 0.81 - 2.48)                                                                                                  |  | Moderate |

|                 |      |                        |                                                   |                                       |      |                                         |                                                                                          |  |                                                                                                                                                                                               |  |          |
|-----------------|------|------------------------|---------------------------------------------------|---------------------------------------|------|-----------------------------------------|------------------------------------------------------------------------------------------|--|-----------------------------------------------------------------------------------------------------------------------------------------------------------------------------------------------|--|----------|
| Le Moual et al. | 2004 | France                 | 1975                                              | Population-based cross-sectional      | 8832 | Questionnaire                           | Age, Gender, Smoking                                                                     |  | WRA OR 1.04 (95% CI 0.70 - 1.54)                                                                                                                                                              |  | Moderate |
| Eng et al.      | 2010 | New Zealand            | 2004-2006                                         | Population-based cross-sectional      | 3055 | Telephone survey                        | Age, Gender, Smoking, Deprivation                                                        |  | WRA OR 1.3 (95% CI 0.8 - 2.1)                                                                                                                                                                 |  | Moderate |
| Vizcaya et al.  | 2011 | Spain                  | 2007-2008                                         | Workforce-based cross-sectional study | 917  | Questionnaire                           | Age, Gender, Smoking, Nationality                                                        |  | WRA OR 2.1 (95% CI 1.1 - 4.2)                                                                                                                                                                 |  | Moderate |
| Radon et al.    | 2008 | 13 countries in Europe | Baseline study: 1991-1995<br>Follow up: 1998-2003 | Prospective population-based cohort   | 4994 | Face to face interview, Skin prick test | Age<br>Gender<br>Smoking<br>Level of smoking<br>Parental allergy<br>Country of residence |  | Allergic rhinitis in males OR 1.22 (95% CI 0.59 - 2.55)<br>Allergic rhinitis in females OR 1.26 (95% CI 0.81 - 1.95)<br>Perennial rhinitis in males OR 0.99 (95% CI 0.49 - 2.02)<br>Perennial |  | High     |

|                             |      |                                              |           |                                  |       |                                |                                                                                         |                                                 |                                                                                     |                                                           |          |
|-----------------------------|------|----------------------------------------------|-----------|----------------------------------|-------|--------------------------------|-----------------------------------------------------------------------------------------|-------------------------------------------------|-------------------------------------------------------------------------------------|-----------------------------------------------------------|----------|
|                             |      |                                              |           |                                  |       |                                |                                                                                         |                                                 |                                                                                     | rhinitis in females<br>OR 1.70<br>(95% CI<br>1.09 - 2.64) |          |
| Folletti et al.             | 2012 | Italy                                        |           | Population-based cross-sectional | 297   | Questionnaire, Skin prick test | Age, Gender, Smoking, Atopy, Schooling, Cleaning tasks or products                      |                                                 | WRA: 7% in cleaners and 1% in controls (p<0.05)                                     | Rhinitis: 17% in cleaners and 15% in controls (p>0.05)    | Low      |
|                             |      |                                              |           |                                  |       |                                |                                                                                         |                                                 | Possible mechanism: The prevalence of atopy was 30% in cleaners and 48% in controls |                                                           |          |
| Lipinska-Ojrzanowska et al. | 2014 | Poland                                       |           | Population-based cross-sectional | 70    | Questionnaire                  |                                                                                         |                                                 | WRA among cleaners was positively associated with rhinitis (p=0.019)                |                                                           | Very low |
| Svanes et al.               | 2015 | Norway, Sweden, Denmark, Iceland and Estonia | 2010-2012 | Population-based cross-sectional | 13499 | Questionnaire                  | Age, Gender, Smoking, Educational level, Parent's educational level, BMI, Participating | Occupational cleaner<br>≤1 year exposure<br>1-4 | OA OR 1.47 (95% CI 1.22 – 1.27)                                                     |                                                           | High     |
|                             |      |                                              |           |                                  |       |                                |                                                                                         |                                                 | OA OR 0.92 (95% CI 0.65 – 1.31)                                                     |                                                           |          |
|                             |      |                                              |           |                                  |       |                                |                                                                                         |                                                 | OA OR 1.44 (95% CI 1.05                                                             |                                                           |          |

|              |      |      |           |                                  |     |               |                                         |                                     |                                                   |                                                                 |          |
|--------------|------|------|-----------|----------------------------------|-----|---------------|-----------------------------------------|-------------------------------------|---------------------------------------------------|-----------------------------------------------------------------|----------|
|              |      |      |           |                                  |     |               | centre                                  | years exposure<br>≥4 years exposure | – 1.97)<br>OA OR 1.59<br>(95% CI 1.22<br>– 2.08)  |                                                                 |          |
| Radon et al. | 2016 | Peru | 2011-2013 | Population-based cross-sectional | 278 | Questionnaire | Gender, Smoking, Duration of employment |                                     | WRA: 22% in cleaners and 5% in controls (p=0.001) | Allergic rhinitis: 21% in cleaners and 13% in controls (p=0.12) | Moderate |



| DOMESTIC CLEANERS     |      |               |                         |                                  |                 |                           |                                                                                                      |                                                           |                                                                          |                                                                                                          |             |
|-----------------------|------|---------------|-------------------------|----------------------------------|-----------------|---------------------------|------------------------------------------------------------------------------------------------------|-----------------------------------------------------------|--------------------------------------------------------------------------|----------------------------------------------------------------------------------------------------------|-------------|
| Author                | Year | Country       | Year of data collection | Study design                     | Sample size (n) | Method of data collection | Co-variates                                                                                          | Type of cleaner                                           | Findings                                                                 |                                                                                                          | GRADE score |
|                       |      |               |                         |                                  |                 |                           |                                                                                                      |                                                           | Asthma                                                                   | Rhinitis                                                                                                 |             |
| Zock et al.           | 2001 | Spain         | 1992                    | Population-based cross-sectional | 1339            | Questionnaire             |                                                                                                      | Private domestic cleaners                                 | WRA PR 3.3 (95% CI 1.9 — 5.8)<br>WRA + BHR PR 5.0 (95% CI 1.9 — 13.2)    |                                                                                                          | Moderate    |
| Medina - Ramon et al. | 2003 | Spain         | 2000-2001               | Population-based cross-sectional | 4521            | Questionnaire             | Age, Smoking                                                                                         | Current domestic cleaners<br><br>Former domestic cleaners | WRA OR 1.46 (95% CI 1.10 - 1.92)<br><br>WRA OR 2.09 (95% CI 1.70 - 2.57) | Work-related rhinitis OR 1.18 (95% CI 0.97 - 1.42)<br>Work-related rhinitis OR 1.31 (95% CI 1.13 - 1.51) | High        |
| Ghosh et al.          | 2013 | Great Britain | 1991-2000               | Population-based cross-sectional | 113             | Interview                 | Gender, Smoking, Father's social class, Area of residence at 42 years, Hayfever/allergic rhinitis in | Domestic cleaners                                         | WRA OR 1.79 (95% CI 1.02 - 3.14, p=0.044)                                |                                                                                                          | Moderate    |

|                       |      |         |                         |                                  |                 |                           | childhood    |                                                                   |                                                                      |                                                                                                              |             |  |
|-----------------------|------|---------|-------------------------|----------------------------------|-----------------|---------------------------|--------------|-------------------------------------------------------------------|----------------------------------------------------------------------|--------------------------------------------------------------------------------------------------------------|-------------|--|
| NON-DOMESTIC CLEANERS |      |         |                         |                                  |                 |                           |              |                                                                   |                                                                      |                                                                                                              |             |  |
| Author                | Year | Country | Year of data collection | Study design                     | Sample size (n) | Method of data collection | Co-variates  | Type of cleaner                                                   | Findings                                                             |                                                                                                              | GRADE score |  |
|                       |      |         |                         |                                  |                 |                           |              |                                                                   | Asthma                                                               | Rhinitis                                                                                                     |             |  |
| Medina - Ramon et al. | 2003 | Spain   | 2000-2001               | Population-based cross sectional | 4521            | Questionnaire             | Age, Smoking | Current non-domestic cleaners<br><br>Former non-domestic cleaners | WRA OR 1.08 (95% CI 0.72-1.61)<br><br>WRA OR 1.41 (95% CI 0.91-2.18) | Work-related rhinitis OR 0.92 (95% CI 0.71 - 1.20)<br><br>Work-related rhinitis OR 1.11 (95% CI 0.82 - 1.50) | High        |  |

|                  |      |                       |                 |                                     |                                                                                    |                                |                                                                                                        |                                                                      |                                                                                                                                                                                                                                        |                                                                                                                                                                                          |          |
|------------------|------|-----------------------|-----------------|-------------------------------------|------------------------------------------------------------------------------------|--------------------------------|--------------------------------------------------------------------------------------------------------|----------------------------------------------------------------------|----------------------------------------------------------------------------------------------------------------------------------------------------------------------------------------------------------------------------------------|------------------------------------------------------------------------------------------------------------------------------------------------------------------------------------------|----------|
| Macaira et al.   | 2007 | Brazil                |                 | Population-based cross-sectional    | 341                                                                                | Questionnaire, Skin prick test | Age, Gender, Smoking, Atopy, Number of years employment in non-domestic cleaning, Inhalation accidents | 0.92-3 years exposure<br>3-6.5 years exposure<br>>6.5 years exposure | WRA/rhinitis OR 1.09 (95% CI 1.00 - 1.18)<br>WRA/rhinitis OR 1.28 (95% CI 1.01 - 1.63)<br>WRA/rhinitis OR 1.71 (95% CI 1.02 - 2.89)<br>Possible mechanism: Asthma was significantly associated with atopy OR 2.91 (95% CI 1.36 - 6.71) | Rhinitis in females OR 2.07 (95% CI 1.20 - 3.70) compared to males<br><br>Possible mechanism: Work-related rhinitis was significantly associated with atopy OR 2.06 (95% CI 1.28 - 3.35) | Moderate |
| Mirabelli et al. | 2007 | 13 European countries | 1991, 1998-1999 | Prospective population-based cohort | 332 nursing and related occupation/ 2481 professional or administrative occupation | Questionnaire                  | Age, Gender, Smoking                                                                                   | Working in nursing and other healthcare related jobs                 | OA RR 1.16 (95% CI 0.72 - 1.87)                                                                                                                                                                                                        |                                                                                                                                                                                          | Moderate |

|                |      |        |      |                                  |      |               |                                                                                       |                                                                                                                                |                                                                                                                                                                                                            |  |          |
|----------------|------|--------|------|----------------------------------|------|---------------|---------------------------------------------------------------------------------------|--------------------------------------------------------------------------------------------------------------------------------|------------------------------------------------------------------------------------------------------------------------------------------------------------------------------------------------------------|--|----------|
| Delclos et al. | 2007 | USA    | 2003 | Population-based cross-sectional | 5387 | Questionnaire | Age, Gender, Smoking, Atopy, Ethnicity, Obesity, Seniority (number of years as a HCP) | Healthcare workers<br><br>0-9 years exposure<br><br>10-16 years exposure<br><br>17-26 years exposure<br><br>≥27 years exposure | WRA in females OR 2.31 (95% CI 1.35 – 3.94) compared to males<br><br>WRA OR 1.00<br><br>WRA OR 2.08 (95% CI 0.64 – 6.73)<br><br>WRA OR 3.37 (95% CI 1.10 – 10.26)<br><br>WRA OR 4.10 (95% CI 1.39 – 12.11) |  | High     |
| Obadia et al.  | 2009 | Canada |      | Workforce-based cross-sectional  | 1153 | Questionnaire | Age, Gender, Smoking                                                                  | School or racetrack public building cleaners                                                                                   | OA in males OR 0.93 (95% CI 0.4 – 2.3)<br>OA in females OR 1.00 (95% CI 0.4 – 2.3)                                                                                                                         |  | Moderate |

|                 |      |               |           |                                  |                                                |                                  |                                                                                                                |                                                                |                                                                       |  |          |
|-----------------|------|---------------|-----------|----------------------------------|------------------------------------------------|----------------------------------|----------------------------------------------------------------------------------------------------------------|----------------------------------------------------------------|-----------------------------------------------------------------------|--|----------|
| Dumas et al.    | 2012 | France        | 2003-2007 | Population-based case-control    | 136 hospital workers/ 333 non-exposed subjects | Questionnaire, Expert assessment | Age, Gender, Smoking, BMI                                                                                      | Female hospital workers (healthcare workers/hospital cleaners) | WRA OR 1.14 (95% CI 0.69 - 1.87)                                      |  | High     |
| Ghosh et al.    | 2013 | Great Britain | 1991-2000 | Population-based cross-sectional | 516                                            | Interview                        | Gender, Smoking, Father's social class, Area of residence at 42 years, Hayfever/allergic rhinitis in childhood | Office and hotel cleaners                                      | WRA OR 1.82 (95% CI 1.34 - 2.48, p<0.001)                             |  | Moderate |
| Gonzalez et al. | 2014 | France        | 2006-2007 | Workforce-based cross-sectional  | 153                                            | Questionnaire                    | Age, Gender, Smoking, Atopy, BMI                                                                               | Hospital cleaners                                              | WRA OR 2.38 (95% CI 0.48 - 11.85)<br>OA OR 2.33 (95% CI 0.52 - 10.44) |  | Moderate |

OR: Odds Ratio, CI: Confidence Interval, RR: Relative Risk, WRA: Work-related asthma, OA: Occupational Asthma

**Table S4:** Summary of epidemiological studies assessing the associations between professional cleaning work and lung function, and bronchial hyperresponsiveness (BHR). Also low/very low quality studies are included.

| Author              | Year | Country                          | Year of data collection | Study design                     | Sample size (n)      | Method of data collection               | Co-variates                                                                                                                                                       | Type of cleaner          | Findings                                                                                                                                                      |                                                                                 | GRADE score |
|---------------------|------|----------------------------------|-------------------------|----------------------------------|----------------------|-----------------------------------------|-------------------------------------------------------------------------------------------------------------------------------------------------------------------|--------------------------|---------------------------------------------------------------------------------------------------------------------------------------------------------------|---------------------------------------------------------------------------------|-------------|
|                     |      |                                  |                         |                                  |                      |                                         |                                                                                                                                                                   |                          | Lung function                                                                                                                                                 | BHR                                                                             |             |
| Zock et al.         | 2002 | 11 European and 3 outside Europe |                         | Population-based cross-sectional | 4796                 | Spirometry, Methacholine challenge test | Age, Gender, Smoking, Study centre                                                                                                                                |                          | Not significantly associated with changes in FEV <sub>1</sub> , FVC or FEV <sub>1</sub> /FVC but was significantly associated with a decrease in PEF (p<0.05) | No significant association OR 1.60 (p>0.05)                                     | Moderate    |
| Medina-Ramon et al. | 2005 | Spain                            | 2000-2001               | Nested case-control              | 40 case/155 controls | Spirometry, Methacholine challenge test | Age, Smoking, Cleaning tasks and products, Current or former employment in non-domestic cleaning jobs, History/inhalation accidents relating to cleaning products | Female domestic cleaners | No significant difference between cases and controls with regards to FEV <sub>1</sub>                                                                         | Large difference in the rates of BHR (18% versus 3%) between cases and controls | Moderate    |

|                                |      |           |           |                                  |    |                          |                                |                   |                                                                                                               |                                                                                                                                                                                                          |          |
|--------------------------------|------|-----------|-----------|----------------------------------|----|--------------------------|--------------------------------|-------------------|---------------------------------------------------------------------------------------------------------------|----------------------------------------------------------------------------------------------------------------------------------------------------------------------------------------------------------|----------|
| Karadzinska-Bislimovska et al. | 2007 | Macedonia | 2004-2006 | Population-based cross-sectional | 88 | Histamine challenge test | Smoking, BMI, Baseline FEV1    | Female cleaners   |                                                                                                               | Prevalence of BHR was higher in cleaners than controls though not significant (30.2% vs 17.7%). Prevalence of borderline BHR was significantly higher in cleaners than controls (16.2% vs 6.6%, p=0.032) | Low      |
| Makela et al.                  | 2011 | Finland   | 1994-2004 | Registry-based cross-sectional   | 20 | Spirometry               |                                | Female cleaners   | Flow-volume spirometry was normal in 12 subjects and there was mild deterioration in the remaining 8 subjects |                                                                                                                                                                                                          | Low      |
| Corradi et al.                 | 2012 | Italy     |           | Workforce-based cross-sectional  | 80 | Spirometry               | Age, Gender, Ethnicity, Height | Hospital cleaners | Cleaners had spirometry results within the normal range after adjustment                                      |                                                                                                                                                                                                          | Moderate |

|                |      |               |           |                                  |                          |                                         |                                                                                                                |                           |                                                                                                                                                                                                   |  |          |
|----------------|------|---------------|-----------|----------------------------------|--------------------------|-----------------------------------------|----------------------------------------------------------------------------------------------------------------|---------------------------|---------------------------------------------------------------------------------------------------------------------------------------------------------------------------------------------------|--|----------|
| Vizcaya et al. | 2013 | Spain         | 2008-2009 | Nested case-control              | 42 cases/<br>53 controls | Spirometry during detailed clinic visit | Age, Gender, Smoking                                                                                           |                           | Pre- and post-bronchodilator FEV <sub>1</sub> /FVC ratios were significantly lower in cases compared to controls. OR -4.4 (95% CI -7.4 to -1.5) and OR -5.2 (-8.8 to -1.6), respectively.         |  | Moderate |
| Ghosh et al.   | 2013 | Great Britain | 1991-2000 | Population-based cross-sectional | 516                      | Spirometry, Interview                   | Gender, Smoking, Father's social class, Area of residence at 42 years, Hayfever/allergic rhinitis in childhood | Office and hotel cleaners | Airflow limitation with adult-onset asthma OR 2.25 (95% CI 1.19 - 4.24, p=0.012)                                                                                                                  |  | Moderate |
| Vizcaya et al. | 2015 | Spain         | 2008-2009 | Workforce-based cross-sectional  | 21                       | Spirometry                              | Age, Smoking, Having a cold or flu, Use of respiratory medication                                              | Female cleaners           | FEV <sub>1</sub> evening following exposure: -86ml (95% CI -212 to 39)<br>FEV <sub>1</sub> morning following exposure: -50ml (95% CI -181 to 81)<br>Diurnal variation in FEV <sub>1</sub> : 2.8ml |  | Low      |



|                  |      |       |  |                                 |    |            |                    |                                    |                                                                                                                          |  |          |
|------------------|------|-------|--|---------------------------------|----|------------|--------------------|------------------------------------|--------------------------------------------------------------------------------------------------------------------------|--|----------|
|                  |      |       |  |                                 |    |            |                    |                                    | (95% CI -1.0 to 6.6)                                                                                                     |  |          |
| Casimirri et al. | 2016 | Italy |  | Workforce-based cross-sectional | 78 | Spirometry | Age, Smoking, BMI, | Caucasian female hospital cleaners | No significant association between cleaning and FEV <sub>1</sub> , FVC (% predicted) and the FEV <sub>1</sub> /FVC ratio |  | Moderate |

OR: Odds Ratio; GMR: Geometric mean ratio; CI: Confidence Interval; PEF: Peak Expiratory Flow; MEF25: Maximal Expiratory Flow at 25% of vital capacity; MEF50: Maximal expiratory flow at 50% of vital capacity; FEV1: Forced Expiratory Volume in one second; FVC: Forced Vital Capacity; OASYS – Occupational asthma expert system; PD20: Administered cumulative dose of methacholine which results in a drop in FEV1 by 20%

**Table S5:** Summary of epidemiological studies assessing the association between professional cleaning work and upper respiratory symptoms and lower respiratory symptoms. Also low/very low quality studies are included.

| Author                         | Year | Country   | Year of data collection | Study design                     | Sample size (n) | Method of data collection | Co-variates                                                                    | Type of cleaner          | Findings                                                                          |                                                                                                                      | GRADE score |
|--------------------------------|------|-----------|-------------------------|----------------------------------|-----------------|---------------------------|--------------------------------------------------------------------------------|--------------------------|-----------------------------------------------------------------------------------|----------------------------------------------------------------------------------------------------------------------|-------------|
|                                |      |           |                         |                                  |                 |                           |                                                                                |                          | URTSs                                                                             | LRTSs                                                                                                                |             |
| Medina-Ramon et al.            | 2006 | Spain     | 2001-2002               | Population-based cross-sectional | 43              | Questionnaire             | Age, Smoking, Respiratory infections, Maintenance medications, Exposure period | Female domestic cleaners | URTSs not significantly associated with the working day OR 1.1 (95% CI 0.6 – 2.3) | LRTSs significantly associated with the working day OR 3.1 (95% CI 1.4 – 7.1)                                        | Moderate    |
| Karadzinska-Bislimovska et al. | 2007 | Macedonia | 2004-2006               | Population-based cross-sectional | 88              | Questionnaire             | Smoking, BMI, Baseline FEV1                                                    | Female cleaners          |                                                                                   | Significantly higher prevalence of phlegm (p=0.019) and dyspnoea (p=0.041) in cleaners compared to the control group | Low         |

|                           |      |        |           |                                       |      |               |                                                                                                       |                                              |                                                                                                                                  |          |
|---------------------------|------|--------|-----------|---------------------------------------|------|---------------|-------------------------------------------------------------------------------------------------------|----------------------------------------------|----------------------------------------------------------------------------------------------------------------------------------|----------|
| Declos et al.             | 2007 | USA    | 2003      | Population-based cross-sectional      | 3650 | Questionnaire | Age, Gender, Smoking, Atopy, Obesity (BMI>30kg/m <sup>2</sup> ), Seniority (number of years as a HCP) | Nurses                                       | BHR-related symptoms <sup>a</sup> OR 1.95 (95% CI 1.51–2.52)                                                                     | High     |
| Obadia et al.             | 2009 | Canada |           | Workforce-based cross-sectional       | 1153 | Questionnaire | Age, Gender, Smoking                                                                                  | School or racetrack public building cleaners | Prevalence of LRTSs in females OR 2.59 (95% CI 1.6 - 4.3)<br>Prevalence of LRTSs in males OR 1.16 (95% CI 0.7 – 1.9)             | Moderate |
| Wieslander et al.         | 2010 | Sweden |           | Population-based cross-sectional      | 21   | Questionnaire |                                                                                                       | Hospital cleaners                            | Significant increase in nasal symptoms (p<0.001) and throat symptoms (p<0.05)<br>Significant increase in dyspnoea (p<0.01)       | Low      |
| Vizcaya et al.            | 2011 | Spain  | 2007-2008 | Workforce-based cross-sectional study | 831  | Questionnaire | Age, Gender, Smoking, Nationality                                                                     |                                              | Wheeze without having a cold OR 1.3 (95% CI 0.5 - 3.3)<br>Chronic cough OR 1.8 (95% CI 0.7 - 4.7)                                | Moderate |
| Lipinska-Ojrzanska et al. | 2011 |        |           | Population-based cross-sectional      | 103  | Questionnaire |                                                                                                       |                                              | 29.1% subjects reported rhinitis symptoms<br>26.2% subjects reported dyspnoea symptoms and 14.6% reported chronic cough symptoms | Very low |

|                           |      |        |           |                                  |     |                                       |                                  |                   |                                                                                                                                                                                                               |                                                                                                                |          |
|---------------------------|------|--------|-----------|----------------------------------|-----|---------------------------------------|----------------------------------|-------------------|---------------------------------------------------------------------------------------------------------------------------------------------------------------------------------------------------------------|----------------------------------------------------------------------------------------------------------------|----------|
| Corradi et al.            | 2012 | Italy  |           | Workforce-based cross-sectional  | 80  | Questionnaire                         | Age, Gender,                     | Hospital cleaners | Most frequently reported symptoms in cleaners were sneezing (27.5%), nasal and/or pharyngeal itch (25%) and ocular itch (22.5%). No significant difference in symptoms between cleaners and the control group | 22.5% of cleaners reported cough. No significant difference in symptoms between cleaners and the control group | Moderate |
| Lipinska-Ojrzanska et al. | 2014 | Poland |           | Population-based cross-sectional | 70  | Questionnaire                         |                                  |                   | Cleaners suffered mainly from cough (84%)                                                                                                                                                                     |                                                                                                                | Very low |
| Gonzalez et al.           | 2014 | France | 2006-2007 | Workforce-based cross-sectional  | 153 | Questionnaire                         | Age, Gender, Smoking, Atopy, BMI | Hospital cleaners | Nasal symptoms OR 1.73 (95% CI 0.89 - 3.34)                                                                                                                                                                   |                                                                                                                | Moderate |
| Lee et al.                | 2014 | USA    |           | Workforce-based cross-sectional  | 183 | Questionnaire, Face to face interview | Age, Gender, Job title           | Hospital cleaners | Respiratory symptoms OR 1.01 (95% CI 0.40 – 2.50)<br>High                                                                                                                                                     |                                                                                                                |          |

|                           |      |                                              |           |                                  |       |               |                                                                                                |                                                                              |                                                                                                                                                                                         |          |
|---------------------------|------|----------------------------------------------|-----------|----------------------------------|-------|---------------|------------------------------------------------------------------------------------------------|------------------------------------------------------------------------------|-----------------------------------------------------------------------------------------------------------------------------------------------------------------------------------------|----------|
|                           |      |                                              |           |                                  |       |               |                                                                                                |                                                                              | Stuffy, itchy or runny nose (19%) was the most common respiratory symptom                                                                                                               |          |
| Lipinska-Ojrzanska et al. | 2014 | Poland                                       |           | Workforce-based cross-sectional  | 142   | Questionnaire |                                                                                                | Health centre cleaners                                                       | Nasal (rhinitis) symptoms (34.5%) were the most common<br>Dyspnoea was present in 25.4% of subjects and cough in 24.0% subjects                                                         | Low      |
| Svanes et al.             | 2015 | Norway, Sweden, Denmark, Iceland and Estonia | 2010-2012 | Population-based cross-sectional | 13499 | Questionnaire | Age, Gender, Smoking, Educational level, Parent's educational level, BMI, Participating centre |                                                                              | Risk of wheeze in ever-cleaners OR 1.44 (95% CI 1.27 – 1.62)<br><br>Asthma symptoms OR 1.66 (95% CI 1.46 – 1.90)                                                                        | High     |
| Felix et al.              | 2016 |                                              |           | Population-based cross-sectional | 167   | Questionnaire |                                                                                                | Hospital cleaners (G1)<br>University cleaners (G2)<br>Domestic cleaners (G3) | Rhinitis symptoms (G1- 46%, G2-25%, G3-29%).<br>Controls presented with no respiratory symptoms<br>Asthma symptoms (G1-43%, G2-57%).<br>Controls presented with no respiratory symptoms | Very low |

|                           |      |        |      |                                  |                               |               |                      |                                    |                                                                                      |          |
|---------------------------|------|--------|------|----------------------------------|-------------------------------|---------------|----------------------|------------------------------------|--------------------------------------------------------------------------------------|----------|
| Casimirri et al.          | 2016 | Italy  |      | Workforce-based cross-sectional  | 80                            | Questionnaire | Age, Smoking, BMI,   | Caucasian female hospital cleaners | No significant difference in symptoms between cleaners and administrative employees  | Moderate |
| Fell et al.               | 2016 | Norway | 2013 | Longitudinal case-control        | 247 cases/<br>15,655 controls | Questionnaire | Age, Gender, Smoking |                                    | Job change due to respiratory symptoms OR 5.0 (95% CI 2.2 - 11)                      | Low      |
| Lipinska-Ojrzanska et al. | 2017 | Poland |      | Population-based cross-sectional | 50                            | Questionnaire |                      | Female cleaners                    | No significant difference in respiratory symptoms in cleaners with or without asthma | Moderate |

BHR-related symptoms based on the following eight factors: trouble breathing, wheezing and/or attacks of shortness of breath in the previous 12 months, nocturnal cough and/or chest tightness in the previous 12 months and current allergic symptoms when in the presence of animals, feathers, dust, trees, grasses, flowers, or pollen. OR: Odds Ratio; CI: Confidence Interval; URTSs: Upper Respiratory Tract Symptoms; LRTSs: Lower Respiratory Tract Symptoms.

**Table S6.** Summary of epidemiological studies assessing the associations between professional cleaning work and respiratory health effects retrieved via OpenGrey.

| Author, Year                     | Country | Year of data collection | Study design                           | Sample size (n)                        | Method of data collection            | Co-variates | Type of exposure  | Findings                                                                                                                                                                                                                                        | GRADE score |
|----------------------------------|---------|-------------------------|----------------------------------------|----------------------------------------|--------------------------------------|-------------|-------------------|-------------------------------------------------------------------------------------------------------------------------------------------------------------------------------------------------------------------------------------------------|-------------|
| Nasir 2011 (Abstract)            | UK      | Not available           | Workforce-based Cross-sectional survey | 216 cleaners, 645 administrative staff | Questionnaires                       | Age         | Hospital cleaners | current asthma<br>OR =1.21, 95% CI: 0.77-1.84)<br><br>chronic bronchitis<br>(OR=1.52, 95% CI 0.98 to 2.33)                                                                                                                                      | Very Low    |
| Mijakoski et al. 2013 (Abstract) | FYROM   | Not available           | Population-based case-control          | 100 cleaners                           | Spirometry, Histamine challenge test | None        | Female cleaners   | Female cleaners had a higher prevalence of BHR vs. office workers (p<0.05), and lower MEF25 (p<0.025), and MEF50 (p<0.05). More respiratory symptoms (36% vs 16%, p<0.05): cough (38% vs 14%, p<0.05), shortness of breath (40% vs 18%, p<0.05) | Very Low    |

|                                   |    |      |                                        |    |                                         |             |                                              |                                                                                                                                                                                                       |          |
|-----------------------------------|----|------|----------------------------------------|----|-----------------------------------------|-------------|----------------------------------------------|-------------------------------------------------------------------------------------------------------------------------------------------------------------------------------------------------------|----------|
| Alfajjam et al. 2012 (PhD thesis) | UK | 2012 | Workforce-based cross-sectional survey | 13 | Spirometry, Methacholine challenge test | Age, gender | Cleaners in hospital trusts and universities | Only one subject had an OASYS score of > 2.5 indicative of occupational asthma. The mean OASYS score was 1.97. Mean PD20 at work was 193 $\mu$ g and away from work mean PD20 was 254 $\mu$ g (p=0.5) | Very low |
|-----------------------------------|----|------|----------------------------------------|----|-----------------------------------------|-------------|----------------------------------------------|-------------------------------------------------------------------------------------------------------------------------------------------------------------------------------------------------------|----------|





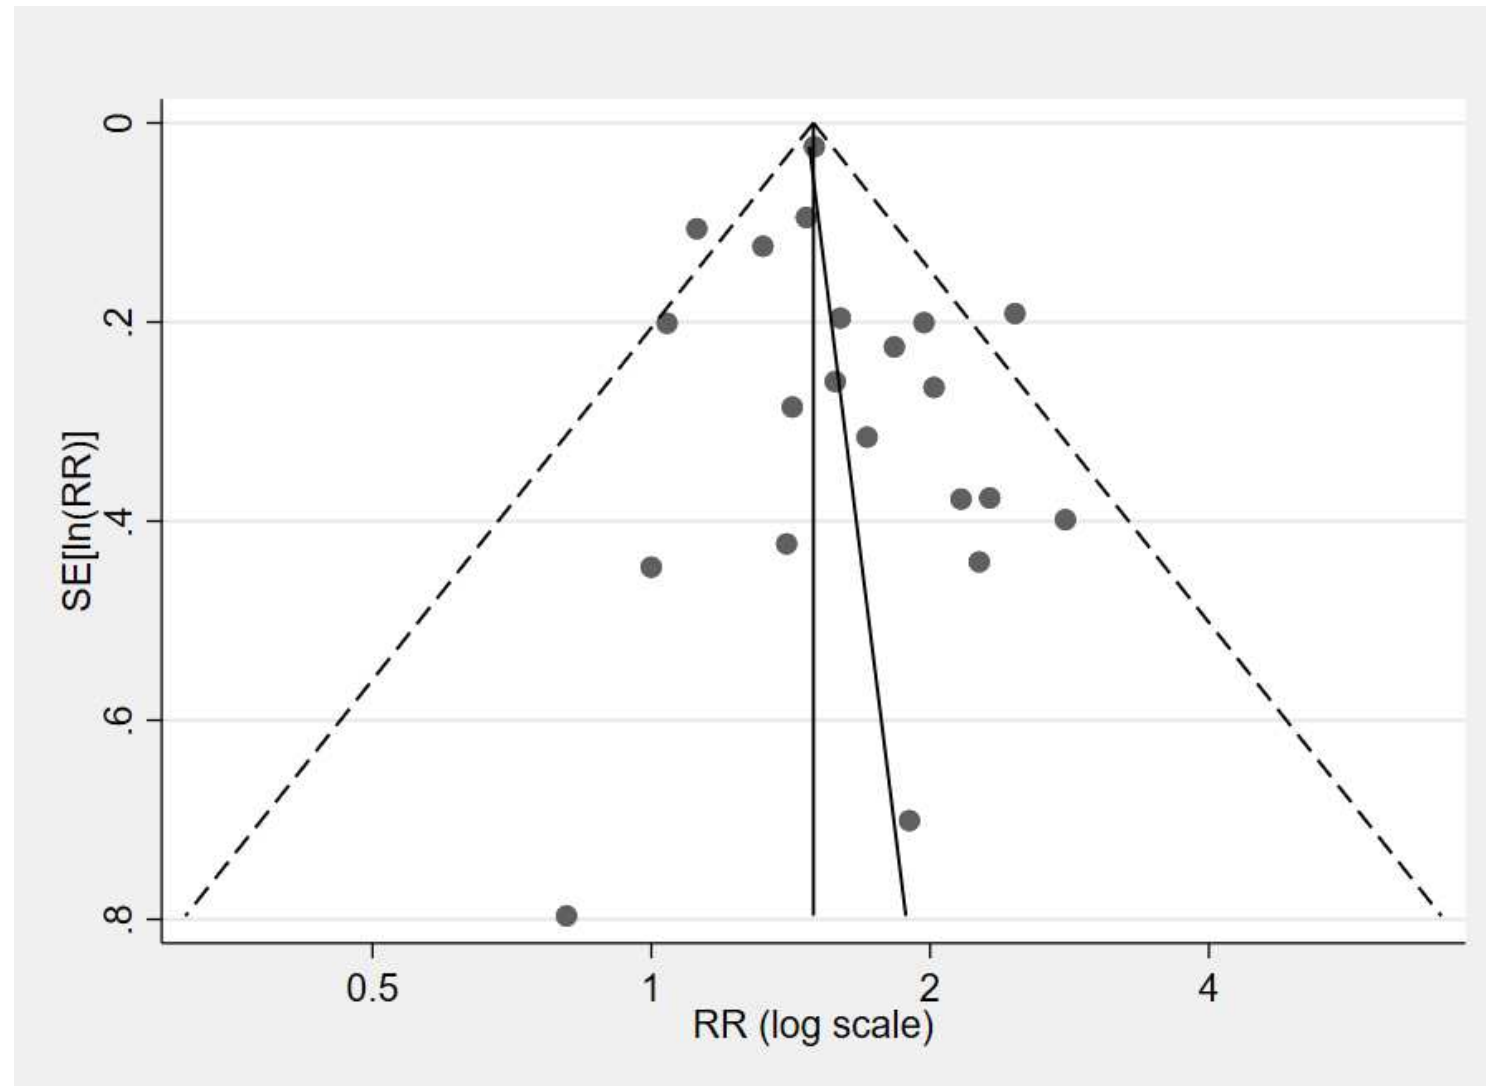

**Figure S1** Funnel plot including 21 studies pooled in the meta-analysis for asthma outcome to assess publication bias.

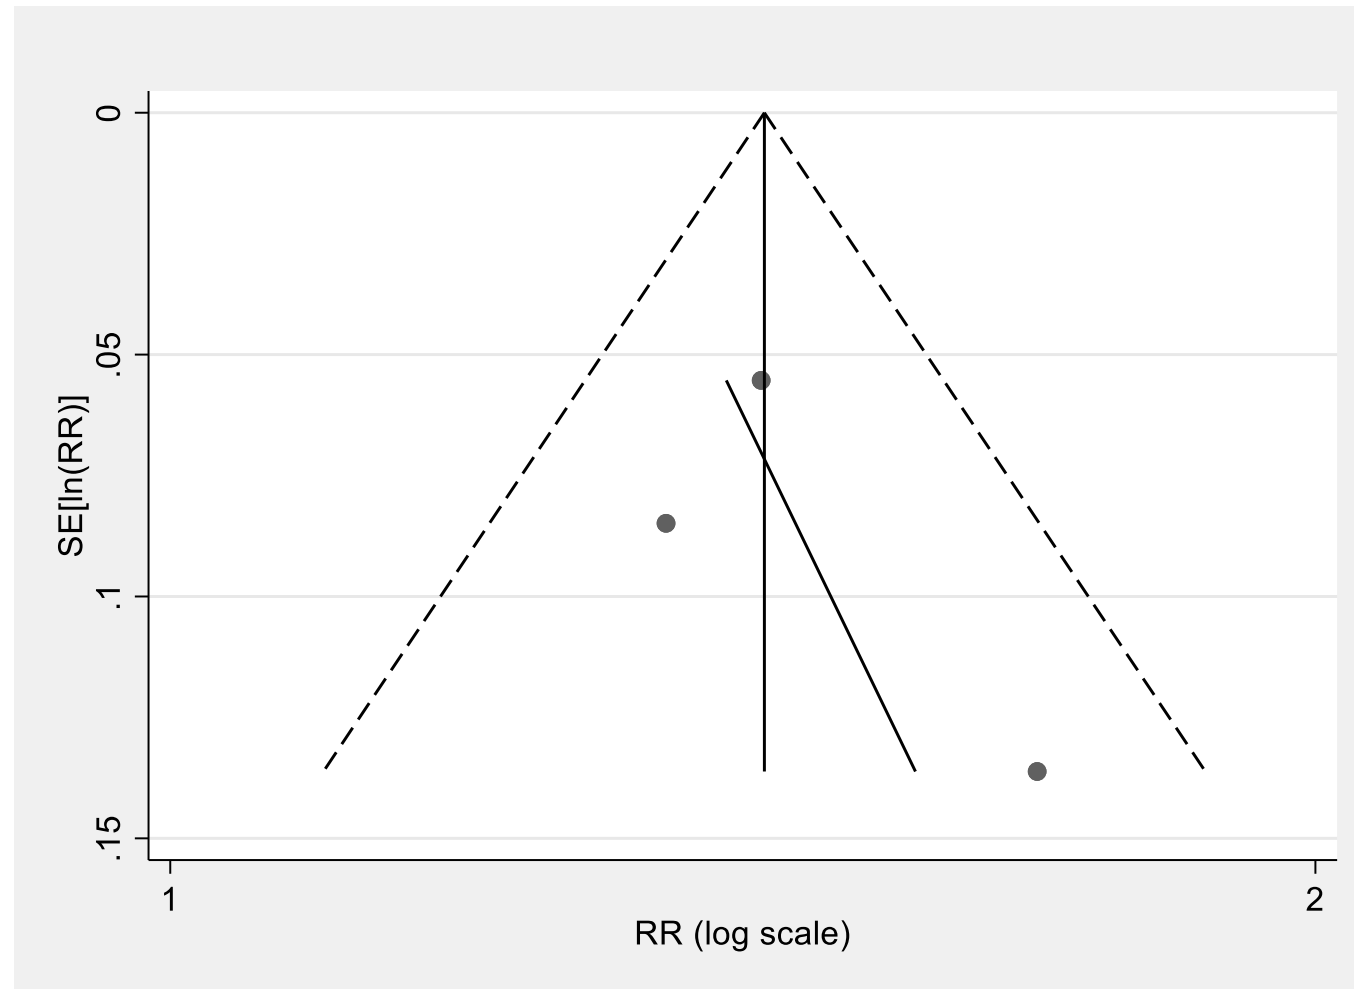

**Figure S2** Funnel plot including three studies pooled in the meta-analysis for chronic obstructive pulmonary disease (COPD) outcome to assess publication bias.
